# Supplementary material for: Evolution of the Dietary Patterns across Nutrition Transition in the Sardinian Longevity Blue Zone and Association with Health Indicators in the Oldest Old
Source: MDPI journal article supplement (doi:10.3390/nu13051495), 2021-04-28
Supplement: s1 [file s1]

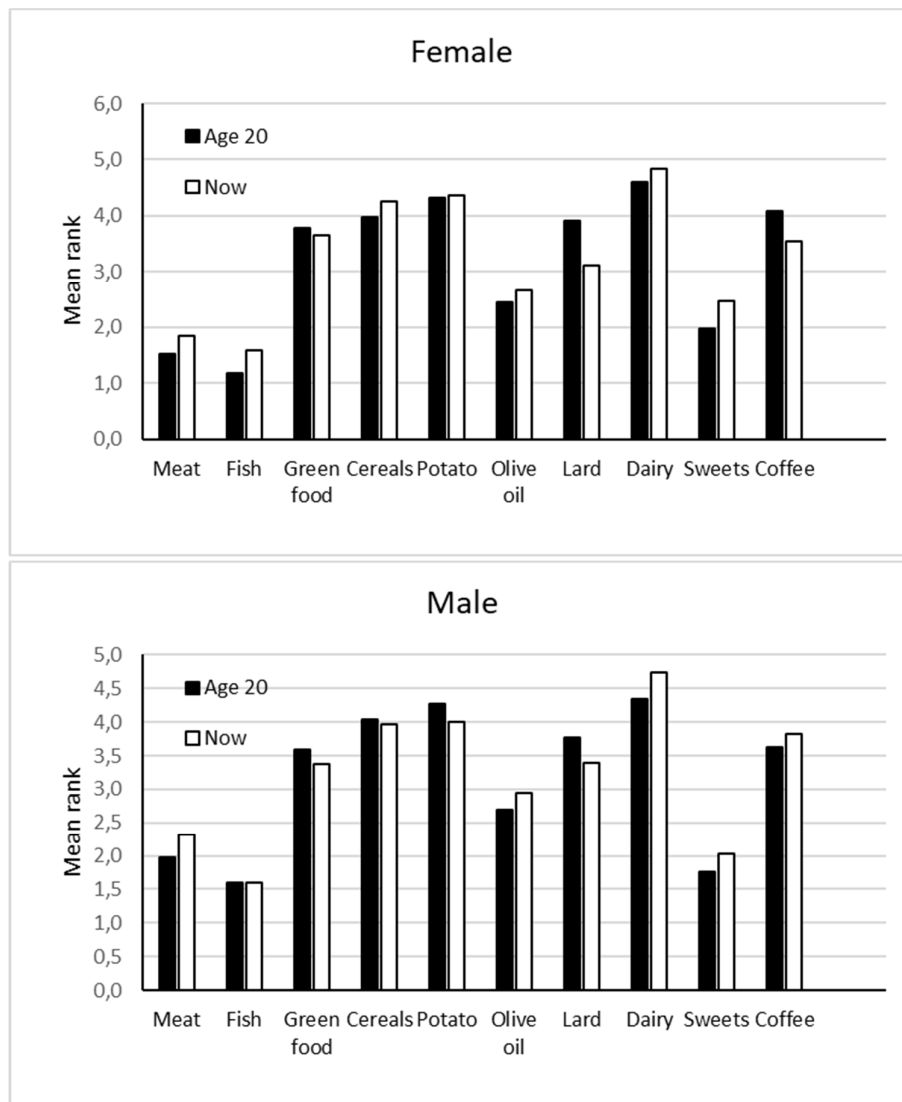

Figure S1

**Table S1.** Food consumption in male and female nonagenarians.

| Foods           | Mean rank           |                   | <i>P</i> -value<br>(Mann–Whitney <i>U</i> test) |
|-----------------|---------------------|-------------------|-------------------------------------------------|
|                 | Females<br>(N = 89) | Males<br>(N = 61) |                                                 |
| Beef/pork meat  | 1.82                | 2.30              | <b>0.004</b>                                    |
| Sheep/goat meat | 2.07                | 2.50              | <b>0.040</b>                                    |
| Chicken meat    | 1.55                | 1.62              | 0.304                                           |
| Fish            | 1.58                | 1.59              | 0.872                                           |
| Pulses          | 3.82                | 3.61              | <b>0.024</b>                                    |
| Greens          | 3.31                | 3.26              | 0.777                                           |
| Fresh fruit     | 3.82                | 3.23              | <b>0.001</b>                                    |
| Bread           | 4.88                | 4.64              | <b>0.019</b>                                    |
| Pasta           | 3.62                | 3.31              | <b>0.015</b>                                    |
| Potatoes        | 4.36                | 4.00              | <b>0.001</b>                                    |
| Olive oil       | 2.67                | 2.95              | 0.042                                           |
| Lard            | 3.12                | 3.39              | 0.066                                           |
| Sweets          | 2.46                | 2.02              | <b>0.018</b>                                    |
| Cheese          | 4.82                | 4.90              | 0.168                                           |
| Milk            | 4.88                | 4.59              | 0.111                                           |
| Coffee          | 3.55                | 3.82              | 0.069                                           |

**Table S2.** Mean value of health indicators.

| <b>Health indicators</b>                                 | <b>Males<br/>(N=61)</b> | <b>Females<br/>(N=89)</b> |
|----------------------------------------------------------|-------------------------|---------------------------|
| <b>Overall</b>                                           |                         |                           |
| Self-rated health (1-5)                                  | 4.13                    | 2.42                      |
| CIRS (0-6)                                               | 2.20                    | 1.85                      |
| <b>Mental health</b>                                     |                         |                           |
| MMSE (0-30)                                              | 19.07 ± 6.61            | 20.28 ± 5.34              |
| GDS (0-2)                                                | 0.50 ± 0.82             | 0.32 ± 0.69               |
| <b>Functional capacity in activities of daily living</b> |                         |                           |
| BADL (0-6)                                               | 3.79 ± 1.52             | 3.69 ± 1.53               |
| IADL (0-11)                                              | 3.93 ± 3.42             | 3.87 ± 3.43               |
| <b>Mobility</b>                                          |                         |                           |
| Composite score (0-4)                                    | 3.02 ± 0.93             | 2.01 ± 1.10               |
| <b>Sense organs</b>                                      |                         |                           |
| Hearing score (1-4)                                      | 1.95 ± 0.92             | 2.31 ± 0.96               |
| Vision score (1-4)                                       | 2.08 ± 1.11             | 2.60 ± 1.05               |
| <b>Anthropometry</b>                                     |                         |                           |
| Weight (kg)                                              | 61.0 ± 8.1              | 56.6 ± 7.6                |
| Height (cm)                                              | 163.5 ± 4.1             | 154.6 ± 3.0               |
| Body mass index (kg/m <sup>2</sup> )                     | 22.8 ± 3.1              | 23.7 ± 3.3                |
| Waist circumference (cm)                                 | 94.9 ± 9.7              | 100.4 ± 6.7               |
| Arm circumference (cm)                                   | 28.1 ± 3.6              | 26.0 ± 3.0                |
| Calf circumference (cm)                                  | 33.7 ± 3.1              | 30.9 ± 4.0                |
| Leg length (cm)                                          | 41.2 ± 3.6              | 37.9 ± 2.9                |

\* P<0.05; \*\* p<0.01

**Table S3.** Spearman’s coefficients for the association between food frequency and health indicators. Significant effects are highlighted in bold.

| Health indicators                                        | Beef /pork meat | Sheep /goat meat | Chicken meat  | Fish          | Pulses        | Leafy greens | Fresh fruit   | Bread        | Pasta         | Potatoes      | Olive oil     | Lard          | Sweets        | Mature cheese | Milk         | Coffee       |
|----------------------------------------------------------|-----------------|------------------|---------------|---------------|---------------|--------------|---------------|--------------|---------------|---------------|---------------|---------------|---------------|---------------|--------------|--------------|
| <b>Overall</b>                                           |                 |                  |               |               |               |              |               |              |               |               |               |               |               |               |              |              |
| Self-rated health                                        | 0.042           | -0.135           | 0.072         | -0.001        | -0.115        | -0.040       | -0.194        | -0.151       | 0.012         | -0.143        | 0.070         | <b>0.217</b>  | <b>-0.320</b> | <b>0.209</b>  | -0.004       | 0.098        |
| CIRS                                                     | 0.031           | -0.109           | <b>-0.230</b> | 0.021         | 0.035         | 0.049        | -0.093        | -0.070       | <b>-0.362</b> | -0.135        | -0.065        | 0.077         | 0.000         | -0.053        | <b>0.223</b> | 0.064        |
| <b>Mental health</b>                                     |                 |                  |               |               |               |              |               |              |               |               |               |               |               |               |              |              |
| MMSE                                                     | -0.070          | <b>0.370</b>     | 0.118         | <b>0.193</b>  | <b>-0.251</b> | -0.023       | -0.018        | 0.016        | <b>0.223</b>  | -0.146        | 0.049         | -0.004        | <b>-0.246</b> | <b>0.230</b>  | 0.108        | -0.027       |
| GDS                                                      | -0.114          | <b>-0.199</b>    | <b>-0.181</b> | 0.068         | 0.143         | 0.101        | <b>0.244</b>  | <b>0.172</b> | -0.067        | <b>0.186</b>  | -0.046        | <b>-0.213</b> | 0.039         | 0.166         | -0.011       | -0.010       |
| <b>Functional capacity in activities of daily living</b> |                 |                  |               |               |               |              |               |              |               |               |               |               |               |               |              |              |
| BADL                                                     | <b>0.263</b>    | 0.080            | <b>0.284</b>  | 0.154         | -0.050        | 0.093        | <b>0.217</b>  | <b>0.210</b> | 0.055         | <b>0.178</b>  | -0.064        | 0.078         | -0.183        | <b>0.224</b>  | -0.051       | -0.112       |
| IADL                                                     | 0.155           | 0.092            | <b>0.245</b>  | 0.156         | -0.107        | -0.034       | <b>0.199</b>  | <b>0.168</b> | 0.091         | 0.130         | -0.047        | -0.055        | <b>-0.195</b> | 0.128         | -0.009       | -0.072       |
| <b>Mobility</b>                                          |                 |                  |               |               |               |              |               |              |               |               |               |               |               |               |              |              |
| Composite score                                          | 0.072           | -0.102           | <b>0.162</b>  | 0.033         | -0.140        | -0.009       | -0.058        | 0.071        | 0.085         | -0.103        | 0.045         | <b>0.172</b>  | <b>-0.286</b> | 0.141         | 0.004        | 0.049        |
| <b>Sense organs</b>                                      |                 |                  |               |               |               |              |               |              |               |               |               |               |               |               |              |              |
| Hearing                                                  | -0.051          | -0.113           | -0.035        | 0.040         | 0.048         | -0.012       | -0.058        | -0.056       | -0.089        | 0.007         | <b>-0.152</b> | -0.089        | 0.160         | <b>-0.163</b> | 0.094        | 0.073        |
| Vision                                                   | -0.101          | <b>-0.213</b>    | <b>-0.259</b> | <b>-0.172</b> | 0.060         | -0.101       | <b>-0.204</b> | -0.075       | 0.035         | 0.069         | <b>-0.145</b> | 0.106         | 0.140         | -0.160        | 0.153        | -0.082       |
| <b>Anthropometry</b>                                     |                 |                  |               |               |               |              |               |              |               |               |               |               |               |               |              |              |
| Weight                                                   | <b>0.287</b>    | 0.050            | <b>0.302</b>  | 0.069         | -0.089        | -0.042       | 0.048         | -0.012       | 0.088         | <b>0.162</b>  | 0.041         | -0.063        | <b>-0.248</b> | 0.039         | -0.134       | 0.013        |
| Height                                                   | <b>0.171</b>    | -0.096           | 0.099         | 0.019         | -0.135        | 0.003        | -0.119        | -0.025       | -0.139        | -0.125        | 0.093         | 0.121         | -0.173        | 0.138         | -0.020       | 0.139        |
| Body mass index                                          | <b>0.216</b>    | 0.118            | 0.229         | 0.053         | -0.014        | -0.009       | <b>0.169</b>  | 0.040        | 0.137         | <b>0.231</b>  | -0.007        | -0.112        | <b>-0.179</b> | -0.037        | -0.089       | -0.025       |
| Waist circumference                                      | 0.039           | 0.094            | 0.112         | -0.010        | 0.004         | 0.106        | 0.092         | 0.162        | 0.014         | -0.096        | -0.046        | -0.120        | -0.107        | 0.014         | 0.158        | -0.069       |
| Arm circumference                                        | <b>0.301</b>    | <b>0.181</b>     | <b>0.371</b>  | <b>0.176</b>  | 0.020         | -0.002       | 0.077         | 0.026        | <b>-0.200</b> | -0.143        | -0.017        | -0.153        | 0.026         | 0.149         | -0.076       | <b>0.177</b> |
| Calf circumference                                       | <b>0.308</b>    | 0.062            | <b>0.301</b>  | <b>0.179</b>  | 0.078         | -0.014       | 0.071         | 0.037        | -0.107        | -0.157        | 0.003         | -0.041        | -0.039        | <b>0.215</b>  | -0.059       | 0.089        |
| Leg length                                               | <b>0.172</b>    | 0.068            | <b>0.285</b>  | -0.030        | -0.027        | -0.009       | -0.015        | -0.005       | <b>-0.181</b> | <b>-0.230</b> | <b>0.166</b>  | <b>-0.200</b> | -0.013        | 0.160         | 0.092        | 0.051        |

**Table S4.** Spearman’s coefficients for the association between variation in food frequency and health indicators. Significant effects are highlighted in bold.

| Health indicators                                        | Beef /pork meat | Sheep /goat meat | Chicken meat  | Fish          | Pulses        | Leafy greens | Fresh fruit   | Bread  | Pasta         | Potatoes      | Olive oil     | Lard          | Sweets       | Mature cheese | Milk         | Coffee        |
|----------------------------------------------------------|-----------------|------------------|---------------|---------------|---------------|--------------|---------------|--------|---------------|---------------|---------------|---------------|--------------|---------------|--------------|---------------|
| <b>Overall</b>                                           |                 |                  |               |               |               |              |               |        |               |               |               |               |              |               |              |               |
| Self-rated health                                        | 0.082           | -0.036           | -0.100        | 0.044         | -0.005        | 0.042        | -0.171        | -0.196 | -0.035        | -0.092        | <b>0.519</b>  | <b>-0.249</b> | 0.021        | -0.095        | -0.122       | 0.139         |
| CIRS                                                     | 0.066           | -0.147           | <b>-0.424</b> | -0.036        | 0.112         | -0.119       | -0.198        | 0.103  | <b>-0.331</b> | -0.152        | -0.174        | 0.167         | -0.070       | 0.026         | <b>0.300</b> | -0.060        |
| <b>Mental health</b>                                     |                 |                  |               |               |               |              |               |        |               |               |               |               |              |               |              |               |
| MMSE                                                     | 0.071           | <b>0.358</b>     | 0.167         | 0.128         | -0.259        | 0.110        | -0.079        | -0.006 | 0.177         | -0.059        | 0.108         | -0.211        | -0.034       | 0.039         | -0.172       | 0.173         |
| GDS                                                      | -0.130          | -0.089           | -0.186        | -0.035        | -0.152        | -0.052       | 0.098         | -0.111 | -0.069        | 0.102         | -0.167        | -0.082        | -0.144       | 0.161         | 0.025        | -0.074        |
| <b>Functional capacity in activities of daily living</b> |                 |                  |               |               |               |              |               |        |               |               |               |               |              |               |              |               |
| BADL                                                     | <b>0.208</b>    | 0.175            | <b>0.351</b>  | 0.100         | -0.019        | -0.016       | -0.002        | -0.068 | 0.155         | 0.167         | 0.126         | -0.217        | 0.020        | -0.165        | -0.100       | 0.150         |
| IADL                                                     | 0.116           | <b>0.229</b>     | <b>0.333</b>  | 0.047         | -0.060        | -0.071       | -0.012        | 0.017  | 0.194         | 0.079         | -0.057        | <b>-0.236</b> | 0.005        | <b>-0.237</b> | 0.012        | 0.130         |
| <b>Mobility</b>                                          |                 |                  |               |               |               |              |               |        |               |               |               |               |              |               |              |               |
| Composite score                                          | 0.044           | 0.013            | 0.018         | 0.000         | -0.038        | -0.004       | -0.005        | -0.078 | -0.029        | -0.010        | <b>0.502</b>  | -0.198        | -0.010       | -0.157        | -0.177       | 0.157         |
| <b>Sense organs</b>                                      |                 |                  |               |               |               |              |               |        |               |               |               |               |              |               |              |               |
| Hearing                                                  | -0.087          | -0.004           | -0.118        | 0.122         | -0.018        | -0.016       | -0.022        | 0.029  | 0.090         | 0.148         | <b>-0.314</b> | 0.160         | -0.070       | 0.062         | 0.172        | -0.204        |
| Vision                                                   | -0.027          | -0.041           | -0.073        | 0.142         | -0.006        | 0.015        | -0.017        | 0.033  | 0.164         | <b>0.265</b>  | <b>-0.227</b> | 0.121         | -0.033       | 0.158         | 0.111        | <b>-0.270</b> |
| <b>Anthropometry</b>                                     |                 |                  |               |               |               |              |               |        |               |               |               |               |              |               |              |               |
| Weight                                                   | <b>0.392</b>    | <b>0.181</b>     | <b>0.331</b>  | 0.146         | -0.114        | -0.082       | -0.075        | 0.006  | 0.120         | -0.093        | -0.019        | -0.058        | -0.176       | -0.018        | 0.051        | 0.009         |
| Height                                                   | 0.131           | -0.185           | -0.146        | -0.178        | 0.158         | -0.043       | <b>-0.323</b> | 0.015  | -0.195        | -0.223        | 0.036         | 0.162         | 0.027        | -0.087        | 0.215        | 0.221         |
| Body mass index                                          | <b>0.318</b>    | <b>0.268</b>     | <b>0.347</b>  | <b>0.244</b>  | <b>-0.242</b> | -0.075       | 0.113         | 0.007  | 0.186         | 0.056         | -0.012        | -0.125        | -0.207       | 0.058         | -0.095       | -0.104        |
| Waist circumference                                      | 0.051           | -0.105           | 0.002         | 0.107         | -0.115        | -0.030       | 0.066         | 0.137  | -0.157        | -0.239        | <b>-0.276</b> | 0.019         | -0.142       | 0.147         | <b>0.295</b> | -0.119        |
| Arm circumference                                        | <b>0.204</b>    | 0.025            | -0.083        | -0.017        | -0.022        | -0.059       | -0.052        | -0.211 | <b>-0.231</b> | -0.150        | -0.031        | 0.023         | <b>0.044</b> | -0.139        | 0.093        | 0.063         |
| Calf circumference                                       | <b>0.277</b>    | 0.030            | 0.036         | -0.037        | 0.034         | -0.010       | -0.132        | -0.130 | -0.118        | <b>-0.229</b> | 0.129         | -0.060        | -0.040       | -0.103        | 0.159        | 0.121         |
| Leg length                                               | 0.053           | -0.063           | -0.020        | <b>-0.290</b> | <b>0.061</b>  | 0.029        | -0.090        | 0.226  | <b>-0.373</b> | <b>-0.369</b> | <b>-0.226</b> | <b>0.223</b>  | 0.013        | 0.106         | <b>0.276</b> | <b>0.230</b>  |

**Table S5.** Spearman’s coefficients for the association between variation in food frequency and health indicators in males. Significant effects are highlighted in bold.

| Health indicators                                        | Beef /pork meat | Sheep /goat meat | Chicken meat  | Fish          | Pulses        | Greens        | Fresh fruit | Bread        | Pasta         | Potatoes      | Olive oil     | Lard          | Sweets        | Mature cheese | Milk         | Coffee       |
|----------------------------------------------------------|-----------------|------------------|---------------|---------------|---------------|---------------|-------------|--------------|---------------|---------------|---------------|---------------|---------------|---------------|--------------|--------------|
| <b>Overall</b>                                           |                 |                  |               |               |               |               |             |              |               |               |               |               |               |               |              |              |
| Self-rated health                                        | -0.257          | -0.072           | -0.111        | <b>0.429</b>  | -0.163        | 0.131         | -0.091      | -0.153       | 0.276         | 0.216         | <b>0.683</b>  | <b>-0.513</b> | -0.089        | 0.000         | -0.325       | -0.193       |
| CIRS                                                     | -0.072          | -0.078           | -0.308        | 0.049         | 0.084         | -0.028        | 0.030       | 0.211        | <b>-0.451</b> | -0.176        | -0.312        | 0.243         | <b>-0.373</b> | 0.044         | 0.314        | 0.137        |
| <b>Mental health</b>                                     |                 |                  |               |               |               |               |             |              |               |               |               |               |               |               |              |              |
| MMSE                                                     | 0.142           | <b>0.647</b>     | 0.290         | 0.013         | -0.401        | -0.256        | -0.137      | -0.057       | 0.278         | -0.183        | 0.071         | -0.260        | -0.173        | 0.000         | -0.276       | 0.320        |
| GDS                                                      | -0.121          | <b>0.425</b>     | <b>-0.429</b> | <b>-0.404</b> | -0.298        | -0.120        | 0.186       | -0.282       | -0.299        | -0.308        | 0.203         | -0.024        | -0.133        | 0.100         | -0.130       | 0.110        |
| <b>Functional capacity in activities of daily living</b> |                 |                  |               |               |               |               |             |              |               |               |               |               |               |               |              |              |
| BADL                                                     | <b>0.556</b>    | 0.129            | <b>0.387</b>  | 0.052         | -0.218        | -0.209        | -0.114      | -0.115       | 0.193         | 0.098         | 0.059         | -0.096        | -0.037        | -0.299        | -0.149       | -0.012       |
| IADL                                                     | <b>0.396</b>    | 0.160            | <b>0.453</b>  | -0.036        | -0.317        | -0.161        | -0.194      | 0.015        | 0.129         | -0.030        | 0.004         | -0.044        | -0.042        | -0.294        | -0.122       | -0.050       |
| <b>Mobility</b>                                          |                 |                  |               |               |               |               |             |              |               |               |               |               |               |               |              |              |
| Composite score                                          | 0.131           | 0.098            | 0.210         | 0.181         | -0.202        | -0.180        | -0.271      | -0.038       | 0.173         | 0.143         | <b>0.383</b>  | <b>-0.371</b> | -0.108        | -0.264        | -0.310       | -0.064       |
| <b>Sense organs</b>                                      |                 |                  |               |               |               |               |             |              |               |               |               |               |               |               |              |              |
| Hearing                                                  | -0.084          | -0.119           | -0.203        | 0.048         | 0.295         | 0.128         | -0.075      | -0.039       | 0.114         | 0.068         | <b>-0.241</b> | 0.291         | 0.083         | 0.209         | 0.244        | 0.228        |
| Vision                                                   | -0.108          | -0.248           | -0.022        | 0.088         | <b>0.376</b>  | 0.301         | -0.229      | -0.064       | 0.225         | 0.277         | -0.272        | 0.185         | 0.249         | 0.177         | 0.247        | 0.117        |
| <b>Anthropometry</b>                                     |                 |                  |               |               |               |               |             |              |               |               |               |               |               |               |              |              |
| Weight                                                   | <b>0.418</b>    | 0.276            | 0.245         | 0.297         | -0.314        | -0.201        | -0.009      | 0.022        | <b>0.327</b>  | 0.150         | 0.097         | -0.178        | -0.244        | -0.166        | -0.006       | 0.018        |
| Height                                                   | -0.039          | -0.236           | 0.123         | 0.132         | -0.161        | -0.212        | -0.217      | 0.209        | -0.120        | 0.106         | -0.098        | 0.242         | -0.042        | -0.165        | 0.253        | -0.107       |
| Body mass index                                          | <b>0.446</b>    | <b>0.385</b>     | 0.200         | 0.225         | <b>-0.338</b> | -0.186        | 0.061       | -0.029       | <b>0.330</b>  | 0.091         | 0.151         | -0.268        | -0.256        | -0.143        | -0.109       | 0.031        |
| Waist circumference                                      | 0.224           | -0.215           | -0.087        | 0.001         | 0.164         | 0.201         | 0.163       | 0.075        | -0.281        | -0.445        | -0.316        | 0.040         | -0.224        | 0.451         | <b>0.503</b> | -0.149       |
| Arm circumference                                        | 0.105           | -0.089           | -0.285        | -0.141        | -0.292        | -0.315        | 0.278       | -0.259       | -0.190        | -0.086        | -0.104        | 0.036         | 0.148         | -0.216        | -0.166       | -0.147       |
| Calf circumference                                       | <b>0.460</b>    | -0.087           | 0.022         | -0.063        | <b>-0.386</b> | <b>-0.361</b> | 0.242       | -0.074       | -0.110        | -0.128        | 0.057         | -0.122        | -0.060        | -0.114        | 0.107        | 0.045        |
| Leg length                                               | -0.061          | -0.029           | -0.063        | -0.217        | -0.165        | 0.008         | 0.136       | <b>0.387</b> | <b>-0.439</b> | <b>-0.577</b> | <b>-0.319</b> | 0.310         | -0.085        | 0.228         | 0.266        | <b>0.194</b> |

**Table S6.** Spearman’s coefficients for the association between variation in food frequency and health indicators in females. Significant effects are highlighted in bold.

| Health indicators                                        | Beef /pork meat | Sheep /goat meat | Chicken meat  | Fish   | Pulses | Greens | Fresh fruit | Bread  | Pasta  | Potatoes | Olive oil     | Lard          | Sweets | Mature cheese | Milk   | Coffee        |
|----------------------------------------------------------|-----------------|------------------|---------------|--------|--------|--------|-------------|--------|--------|----------|---------------|---------------|--------|---------------|--------|---------------|
| <b>Overall</b>                                           |                 |                  |               |        |        |        |             |        |        |          |               |               |        |               |        |               |
| Self-rated health                                        | 0.100           | 0.254            | 0.166         | −0.030 | −0.080 | 0.091  | 0.101       | 0.074  | 0.076  | 0.101    | <b>0.445</b>  | <b>−0.389</b> | 0.029  | −0.033        | −0.148 | 0.208         |
| CIRS                                                     | 0.081           | −0.144           | <b>−0.494</b> | −0.061 | 0.079  | −0.135 | −0.264      | 0.050  | −0.180 | −0.085   | −0.121        | 0.080         | 0.124  | 0.048         | 0.265  | −0.193        |
| <b>Mental health</b>                                     |                 |                  |               |        |        |        |             |        |        |          |               |               |        |               |        |               |
| MMSE                                                     | 0.101           | 0.292            | 0.061         | 0.177  | −0.145 | 0.218  | −0.112      | 0.096  | 0.110  | −0.026   | 0.111         | −0.228        | −0.023 | 0.027         | −0.097 | 0.113         |
| GDS                                                      | −0.069          | 0.072            | −0.255        | 0.033  | 0.076  | −0.076 | −0.252      | 0.081  | −0.196 | −0.062   | <b>−0.475</b> | 0.045         | −0.147 | 0.137         | 0.330  | 0.005         |
| <b>Functional capacity in activities of daily living</b> |                 |                  |               |        |        |        |             |        |        |          |               |               |        |               |        |               |
| BADL                                                     | 0.104           | 0.170            | 0.274         | 0.094  | 0.197  | 0.083  | −0.045      | 0.036  | 0.043  | 0.229    | 0.170         | −0.258        | 0.031  | −0.101        | −0.035 | 0.213         |
| IADL                                                     | 0.032           | 0.261            | 0.188         | 0.086  | 0.190  | −0.032 | 0.013       | 0.061  | 0.181  | 0.135    | −0.096        | <b>−0.325</b> | 0.043  | −0.201        | 0.182  | 0.208         |
| <b>Mobility</b>                                          |                 |                  |               |        |        |        |             |        |        |          |               |               |        |               |        |               |
| Composite score                                          | −0.036          | 0.033            | 0.013         | 0.020  | −0.003 | 0.129  | 0.280       | 0.092  | −0.037 | 0.172    | <b>0.577</b>  | −0.182        | 0.013  | −0.090        | −0.173 | 0.149         |
| <b>Sense organs</b>                                      |                 |                  |               |        |        |        |             |        |        |          |               |               |        |               |        |               |
| Hearing                                                  | −0.043          | −0.137           | −0.164        | 0.108  | −0.142 | −0.100 | −0.160      | −0.021 | −0.112 | −0.030   | <b>−0.332</b> | 0.217         | −0.138 | −0.054        | 0.241  | −0.292        |
| Vision                                                   | 0.053           | −0.133           | <b>−0.311</b> | 0.076  | −0.101 | −0.176 | −0.158      | 0.016  | −0.039 | 0.047    | −0.169        | 0.208         | −0.149 | 0.120         | 0.131  | <b>−0.330</b> |
| <b>Anthropometry</b>                                     |                 |                  |               |        |        |        |             |        |        |          |               |               |        |               |        |               |
| Weight                                                   | <b>0.337</b>    | 0.216            | <b>0.446</b>  | 0.084  | 0.001  | −0.018 | −0.070      | 0.049  | 0.036  | −0.096   | −0.129        | −0.054        | −0.153 | 0.077         | 0.060  | −0.092        |
| Height                                                   | −0.010          | 0.141            | −0.062        | −0.136 | 0.197  | 0.213  | 0.005       | 0.080  | 0.162  | 0.229    | −0.018        | −0.101        | 0.018  | 0.084         | 0.028  | 0.046         |
| Body mass index                                          | <b>0.347</b>    | 0.148            | <b>0.429</b>  | 0.168  | −0.074 | −0.103 | −0.022      | −0.065 | −0.078 | −0.194   | −0.092        | 0.096         | −0.155 | 0.051         | −0.020 | −0.051        |
| Waist circumference                                      | 0.049           | −0.157           | −0.031        | 0.126  | −0.125 | −0.111 | 0.001       | 0.093  | −0.124 | −0.230   | −0.200        | 0.006         | −0.044 | 0.030         | 0.263  | −0.087        |
| Arm circumference                                        | <b>0.184</b>    | <b>0.309</b>     | <b>0.275</b>  | 0.187  | 0.067  | 0.160  | −0.115      | 0.087  | 0.048  | 0.080    | 0.023         | −0.142        | −0.039 | −0.081        | 0.212  | 0.012         |
| Calf circumference                                       | <b>0.208</b>    | <b>0.319</b>     | 0.260         | 0.275  | 0.128  | 0.214  | −0.045      | 0.102  | 0.093  | −0.038   | 0.145         | −0.188        | −0.144 | −0.049        | 0.051  | 0.069         |
| Leg length                                               | 0.018           | 0.141            | <b>0.313</b>  | −0.150 | 0.136  | 0.119  | 0.011       | −0.012 | −0.008 | 0.132    | −0.199        | −0.084        | 0.088  | 0.109         | 0.175  | 0.123         |
